# Supplementary material
Source: publisher figshare collection journal article supplement (https://karger.figshare.com/ndownloader/files/27358184)
Supplement: Supplementary file 1 [file 27358184]

# Supplementary Material

**Table S2**. C**omparison of every time point between AKI and no-AKI group and this for BTP, NGAL, CysC and serum creatinine**

|  | estimate | LCL | UCL | exp(est) | exp(LCL) | exp(UCL) | Adjusted p-value |
| --- | --- | --- | --- | --- | --- | --- | --- |
| **logBTP** | | | | | | | |
| Time |  |  |  |  |  |  |  |
| Pre-op | 0.321 | 0.102 | 0.540 | 1.379 | 1.108 | 1.717 | 0.0137 |
| Post-op | 0.475 | 0.256 | 0.694 | 1.608 | 1.292 | 2.001 | 0.0002 |
| D1 | 0.547 | 0.325 | 0.770 | 1.729 | 1.383 | 2.161 | <0.0001 |
| D2 | 0.753 | 0.534 | 0.973 | 2.124 | 1.706 | 2.645 | <0.0001 |
| **logNGAL** | | | | | | | |
| Time |  |  |  |  |  |  |  |
| Pre-op | 0.256 | -0.185 | 0.698 | 1.292 | 0.831 | 2.010 | 0.252 |
| Post-op | 0.576 | 0.134 | 1.018 | 1.779 | 1.144 | 2.767 | 0.033 |
| D1 | 0.566 | 0.115 | 1.018 | 1.762 | 1.122 | 2.767 | 0.033 |
| D2 | 0.918 | 0.475 | 1.360 | 2.504 | 1.608 | 3.898 | 0.0003 |
| **logCysC** | | | | | | | |
| Time |  |  |  |  |  |  |  |
| Pre-op | 0.346 | 0.126 | 0.565 | 1.413 | 1.134 | 1.760 | 0.010 |
| Post-op | 0.383 | 0.163 | 0.602 | 1.466 | 1.177 | 1.826 | 0.005 |
| D1 | 0.575 | 0.351 | 0.800 | 1.778 | 1.421 | 2.225 | <0.0001 |
| D2 | 0.763 | 0.543 | 0.983 | 2.144 | 1.721 | 2.672 | <0.0001 |
| **logCreatinine** | | | | | | | |
| Time |  |  |  |  |  |  |  |
| Pre-op | 0.243 | 0.008 | 0.477 | 1.275 | 1.008 | 1.612 | 0.171 |
| Post-op | 0.383 | 0.148 | 0.617 | 1.466 | 1.159 | 1.854 | 0.010 |
| D1 | 0.575 | 0.341 | 0.810 | 1.778 | 1.406 | 2.248 | <0.0001 |
| D2 | 0.958 | 0.724 | 1.193 | 2.607 | 2.062 | 3.296 | <0.0001 |

*Estimates with 95% confidence interval (LCL=lower confidence limit, UCL=upper confidence limit) from the linear mixed model for the comparison of every time point between AKI and no-AKI group and this for BTP, NGAL and serum Creatinine. BTP = beta-trace protein, NGAL = neutrophil gelatinase-associated lipocalin;CysC = cystatin C; sCr = serum creatinine; pre-op = pre-operative; post-op = post-operative; D1 = first post-operative day; D2 = second post-operative day; AKI = acute kidney injury; No-AKI = no acute kidney injury*
